# Supplementary material for: Immune cellular patterns of distribution affect outcomes of patients with non-small cell lung cancer
Source: Research Square preprint supplement (doi:10.21203/rs.3.rs-1755739/v1), 2022-06-24
Supplement: Supplementary file 1 [file 0440b3dd027ef50c26e45a8d.docx]

**Supplementary Table** **4**. Median densities of cell phenotypes by histologic type.

| **Panel** | **Phenotype** | **Cells/mm2** | | | ***P**** |
| --- | --- | --- | --- | --- | --- |
| **NSCLC** | **Adenocarcinoma** | **Squamous cell carcinoma** |
| 1 | CK+ | 2342.70 | 2281.72 | 2609.02 | 0.005 |
| CK+PD-L1+ | 90.63 | 87.74 | 133.65 | 0.051 |
| CD3+ | 834.54 | 1012.85 | 1022.33 | 0.910 |
| CD3+CD8+ | 128.42 | 199.75 | 143.16 | 0.043 |
| CD3+PD-1+ | 39.53 | 53.32 | 71.69 | 0.607 |
| CD3+PD-L1+ | 45.15 | 47.59 | 68.09 | 0.046 |
| CD3+CD8+PD-1+ | 4.75 | 8.73 | 6.27 | 0.479 |
| CD3+CD8+PD-L1+ | 6.42 | 8.26 | 13.12 | 0.139 |
| CD3+PD-1+PD-L1+ | 2.07 | 2.94 | 4.23 | 0.055 |
| CD3+CD8+PD-1+PD-L1+ | 0.00 | 0.18 | 1.16 | 0.049 |
| CD68+ | 277.14 | 312.32 | 382.11 | 0.963 |
| CD68+PD-L1+ | 40.48 | 39.47 | 58.26 | 0.259 |
| 2 | CK+ | 1911.12 | 1812.05 | 2232.66 | 0.013 |
| CD3+ | 961.09 | 1094.53 | 1066.96 | 0.123 |
| CD3+CD8+ | 144.60 | 193.12 | 136.25 | 0.024 |
| CD3+CD8+GZB+ | 5.31 | 6.00 | 6.93 | 0.789 |
| CD3+CD45RO+ | 57.39 | 93.95 | 59.29 | 0.008 |
| CD3+CD8+CD45RO+ | 25.44 | 51.91 | 28.06 | 0.037 |
| CD3+CD8negFOXP3+ | 24.10 | 30.02 | 25.51 | 0.328 |
| CD3+CD45RO+FOXP3+ | 3.67 | 5.26 | 4.73 | 0.109 |
| 3 | CK+ | 2013.57 | 1797.32 | 2307.99 | 0.050 |
| CK+PD-L1+ | 88.90 | 91.40 | 140.72 | 0.089 |
| CK+B7-H3+ | 307.79 | 172.92 | 745.80 | <0.001 |
| CK+B7-H4+ | 7.08 | 1.05 | 31.78 | <0.001 |
| CK+IDO-1+ | 19.17 | 34.06 | 5.09 | 0.015 |
| CD3+ | 813.77 | 974.78 | 948.77 | 0.155 |
| CD3+PD-L1+ | 38.72 | 32.21 | 50.76 | 0.044 |
| CD3+B7-H3+ | 8.86 | 12.73 | 6.32 | 0.388 |
| CD3+B7-H4+ | 0.00 | 0.00 | 0.00 | 0.267 |
| CD3+IDO-1+ | 1.50 | 5.15 | 0.47 | 0.005 |
| CD3+VISTA+ | 1.76 | 2.01 | 1.63 | 0.540 |
| 4 | CK+ | 2028.33 | 1743.00 | 2428.43 | 0.001 |
| CK+OX40+ | 25.38 | 29.97 | 19.33 | 0.557 |
| CD3+ | 929.81 | 1040.91 | 913.43 | 0.143 |
| CD3+ICOS+ | 36.19 | 36.92 | 33.42 | 0.841 |
| CD3+LAG3+ | 229.81 | 240.34 | 213.43 | 0.651 |
| CD3+OX40+ | 12.07 | 14.68 | 8.27 | 0.134 |
| CD3+TIM3+ | 6.64 | 7.90 | 4.20 | 0.020 |
| CD20+ | 80.07 | 73.82 | 97.42 | 0.657 |
| CD20+ICOS+ | 7.44 | 7.17 | 7.87 | 0.497 |
| CD20+OX40+ | 4.72 | 6.79 | 2.76 | 0.157 |
| CD20+TIM3+ | 0.36 | 0.42 | 0.00 | 0.072 |
| CD20+LAG3+ | 31.10 | 28.62 | 35.20 | 0.922 |
| 5 | CK+ | 2528.17 | 2145.2 | 2617.60 | 0.004 |
| CD68+ | 359.51 | 300.73 | 495.39 | 0.064 |
| CD68+Arg-1+ | 1.23 | 1.17 | 1.95 | 0.250 |
| CD68+Arg-1+CD11b+ | 1.20 | 1.17 | 1.73 | 0.314 |
| CD68+CD11b+ | 231.11 | 180.61 | 344.74 | 0.012 |
| CD66b+ | 83.79 | 70.32 | 111.89 | 0.045 |
| CD11b+CD66+ | 33.58 | 29.43 | 41.58 | 0.018 |
| CD11b+Arg-1+CD14+CD33+ | 1.04 | 0.81 | 1.11 | 0.765 |
| CD11b+CD66b+CD33+ | 11.44 | 9.57 | 13.74 | 0.181 |

**Note:** NSCLC, non-small cell lung cancer; CK, cytokeratin; GZB, granzyme B.

**P* values are for comparisons between adenocarcinoma and squamous cell carcinoma.
