# Supplementary material for: Immune cellular patterns of distribution affect outcomes of patients with non-small cell lung cancer
Source: Research Square preprint supplement (doi:10.21203/rs.3.rs-1755739/v1), 2022-06-24
Supplement: Supplementary file 2 [file 2fd8a0ecdf97777a9ef98e6b.docx]

**Supplementary Table 6.** Cellular immunologic distribution groups in non-small cell lung cancer (NSCLC) for the main cell phenotype markers across panels.

| **Phenotype** | **Group** | **Type of NSCLC, no. (%)** | |
| --- | --- | --- | --- |
| **ADC** | **SCC** |
| CD3+ | 1 | 13 (7.3) | 7 (4.0) |
| 2 | 56 (31.6) | 13 (7.3) |
| 3 | 3 (1.7) | 2 (1.1) |
| 4 | 39 (22.0) | 44 (24.9) |
| CD20+ | 1 | 23 (12.8) | 9 (5.0) |
| 2 | 39 (21.8) | 19 (10.6) |
| 3 | 14 (7.8) | 4 (2.2) |
| 4 | 40 (22.3) | 31 (17.3) |
| CD68+ | 1 | 22 (18.6) | 9 (7.6) |
| 2 | 20 (16.9) | 13 (11.0) |
| 3 | 22 (18.6) | 16 (13.6) |
| 4 | 6 (5.1) | 10 (8.5) |
| CD66b+ | 1 | 37 (24.0) | 13 (8.4) |
| 2 | 11 (7.1) | 17 (11.0) |
| 3 | 32 (20.8) | 26 (16.9) |
| 4 | 11 (7.1) | 7 (4.5) |
